# Supplementary material for: Time-lapse live cell imaging to monitor doxorubicin release from DNA origami nanostructures
Source: Royal Society of Chemistry journal article supplement (doi:10.1039/c7tb03223d), 2018-01-01
Supplement: c7tb03223d1.pdf [file c7tb03223d1.pdf]

## Supporting Information

### **Time-lapse live cell imaging to monitor doxorubicin release from DNA origami nanostructures**

Yun Zeng <sup>a</sup>, Jiajun Liu <sup>b,c,d</sup>, Shuo Yang <sup>a</sup>, Wenyan Liu <sup>e</sup>, Liang Xu <sup>b,c</sup>, and Risheng Wang <sup>a\*</sup>

<sup>a</sup> Department of Chemistry, Missouri University of Science and Technology, Rolla, MO  
65409, USA

<sup>b</sup> Department of Molecular Biosciences, The University of Kansas, Lawrence, KS 66045,  
USA

<sup>c</sup> Department of Radiation Oncology, The University of Kansas Cancer Center, Kansas City,  
KS 66160, USA

<sup>d</sup> The Key Laboratory of Biomedical Information Engineering, Ministry of Education, School  
of Life Science and Technology, Xi'an Jiaotong University, Xi'an 710049, P. R. China;

<sup>e</sup> Center for Research in Energy and Environment, Missouri University of Science and  
Technology, Rolla MO 65409, USA

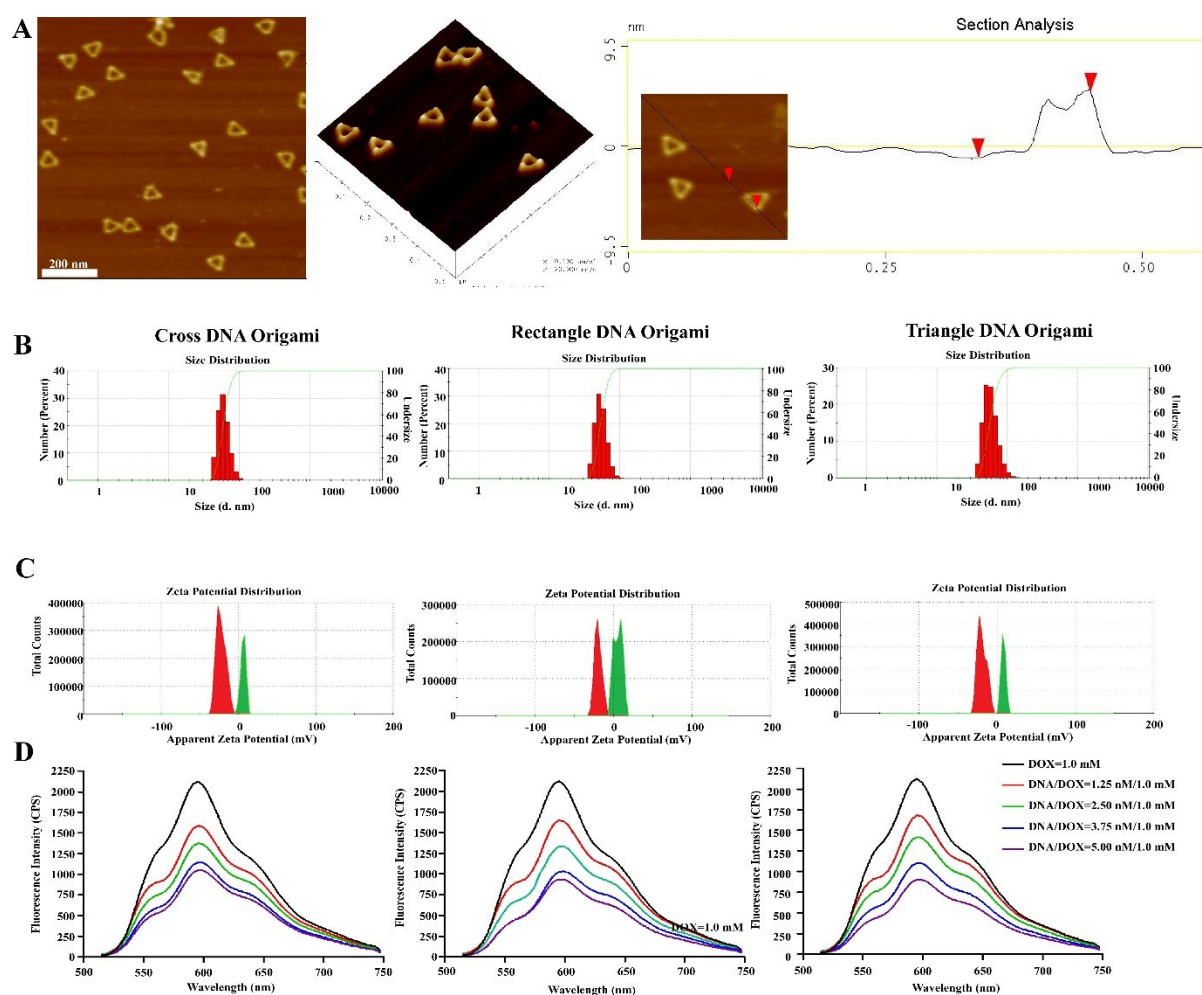

**Figure S1.** Characterization of DNA origami nanocarriers before and after DOX-loading. (A) AFM image (right), 3D image (middle), and height analysis (right) of DNA origami triangle. The height is  $\sim 6.2$  nm. (B) Size distribution of three shapes of DNA origami before DOX loading. (C) zeta-potential of DNA origami nanocarriers before (red) and after DOX loading (green). (D) The fluorescence spectra of DOX (1.0 mM) with a different concentration of DNA origami nanocarriers (0 to 5 nM).

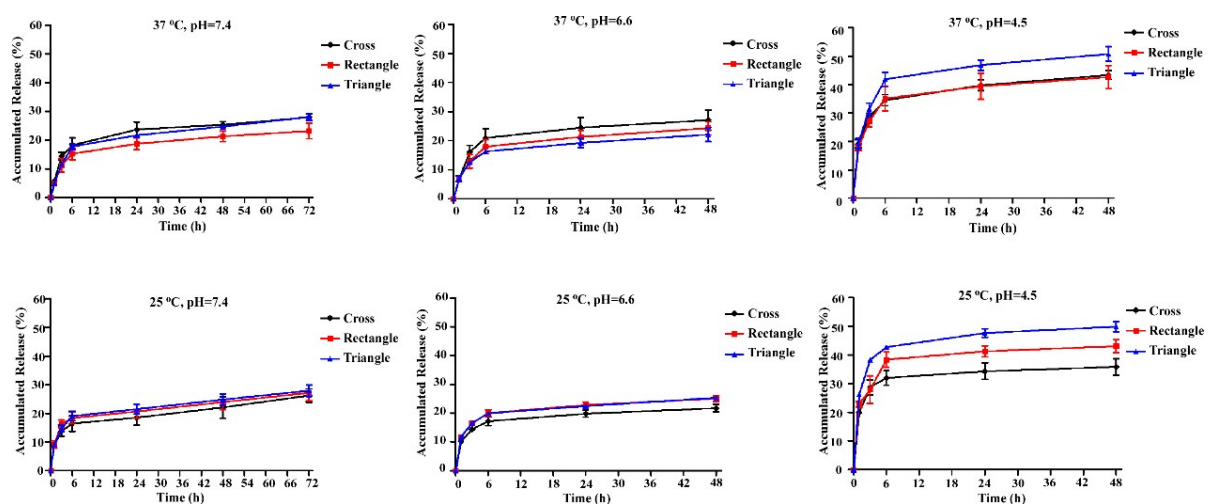

**Figure S2.** DOX release profile from three different shapes of DNA origami (DOX incubation at 25 °C and 37 °C, respectively. The pH values were set as 7.4, 6.6, and 4.5. The accumulated release showed that the DNA origami was acidic triggered release.

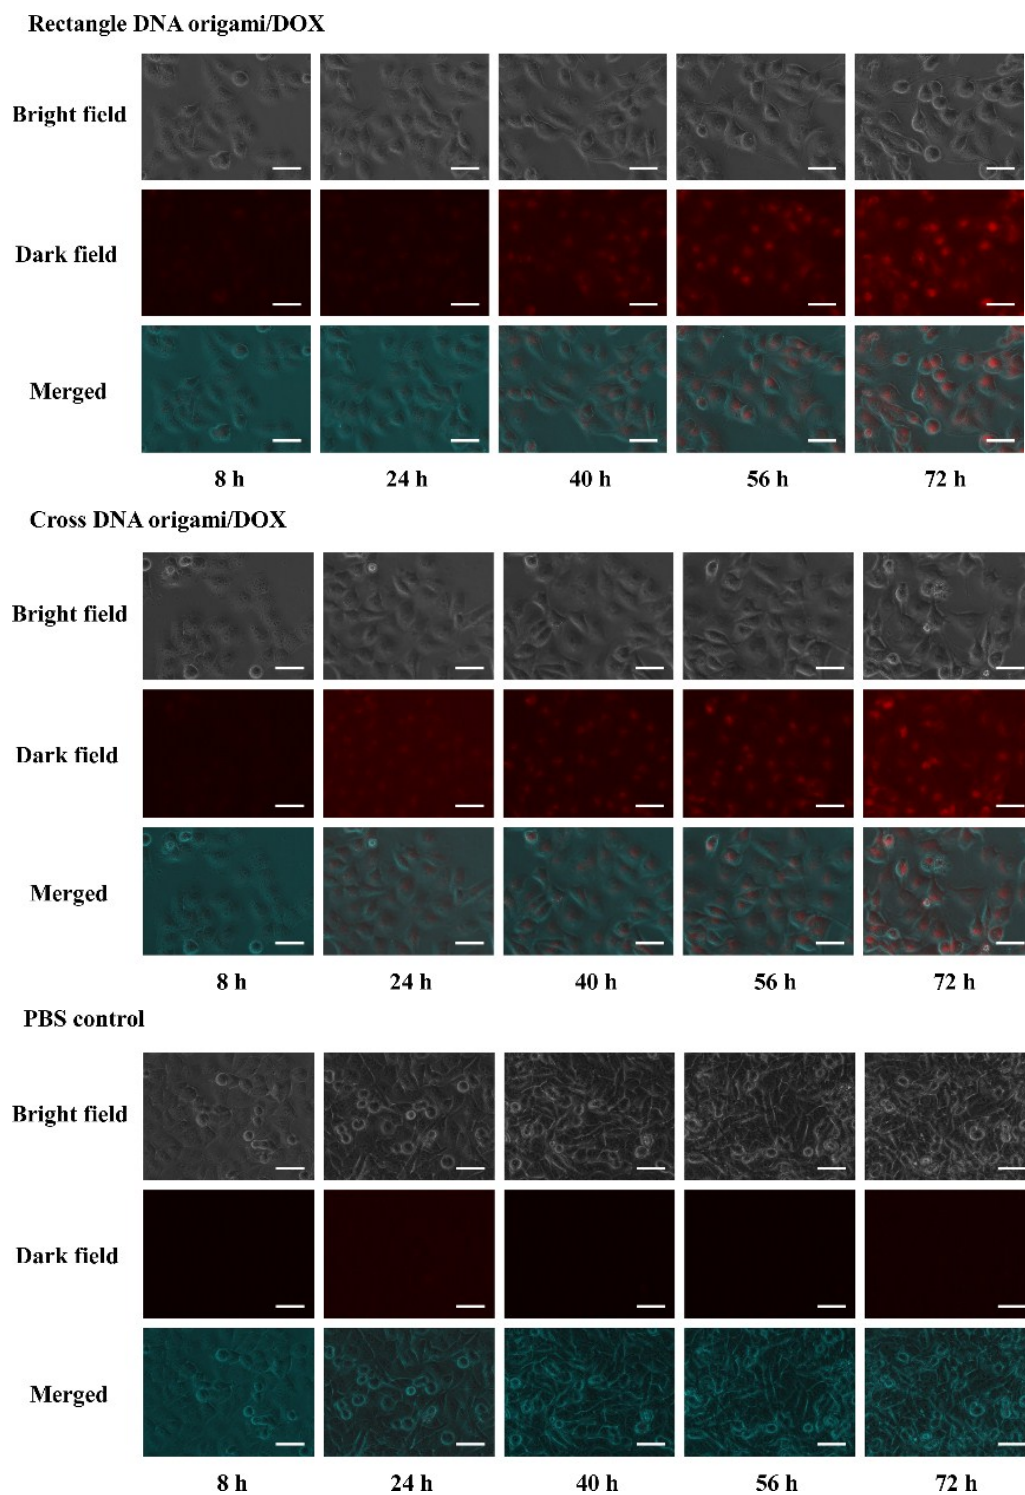

**Figure S3.** *In vitro* time-lapse live cell imaging of DOX-loaded 2D rectangular DNA origami and 2D cross-shaped DNA origami and PBS buffer by using the EVOS cell imaging system. Image was captured every 20 mins, and the picked time point was shown at 8, 24, 40, 56, and 72 h, respectively. The bright field, dark field, and merged images are illustrated. Scale bar: 20  $\mu$ m.

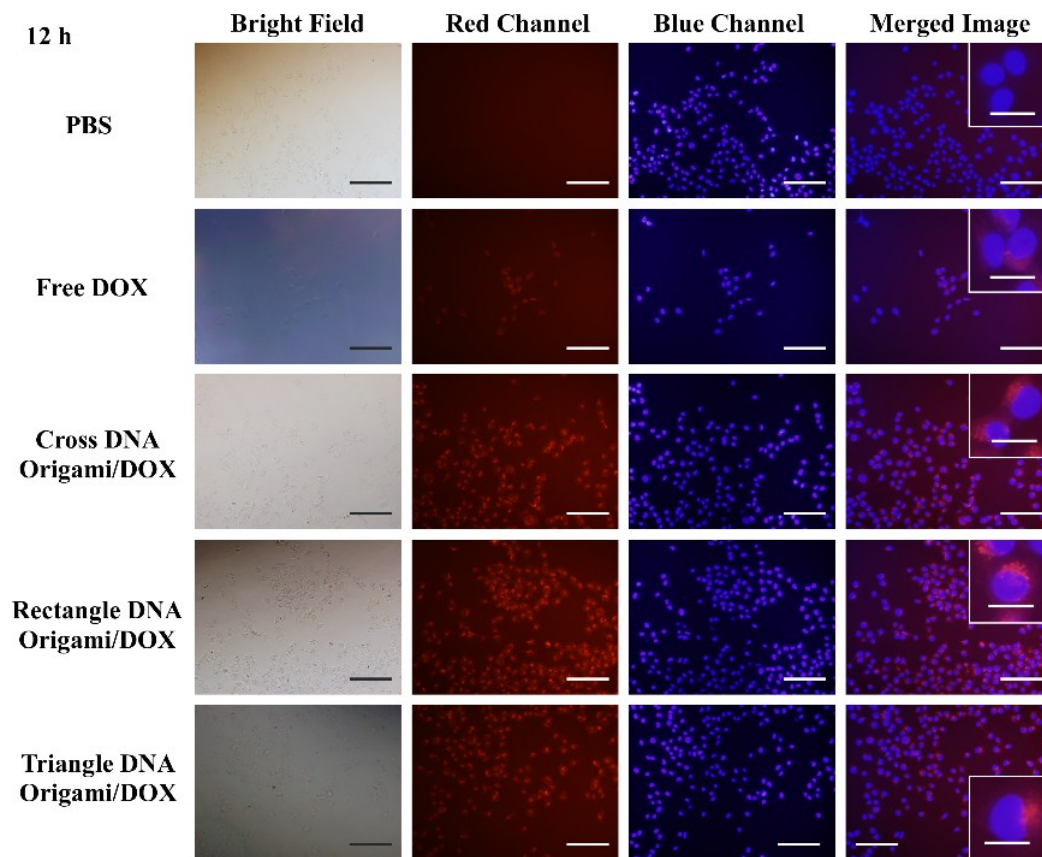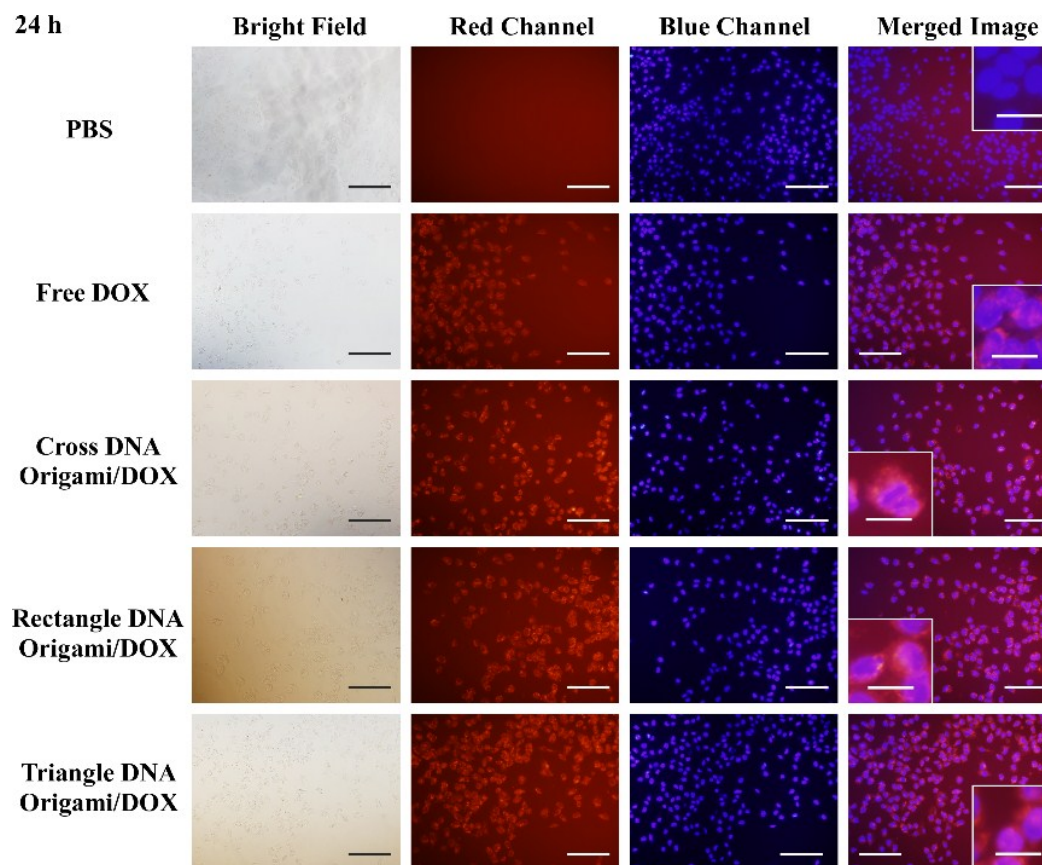



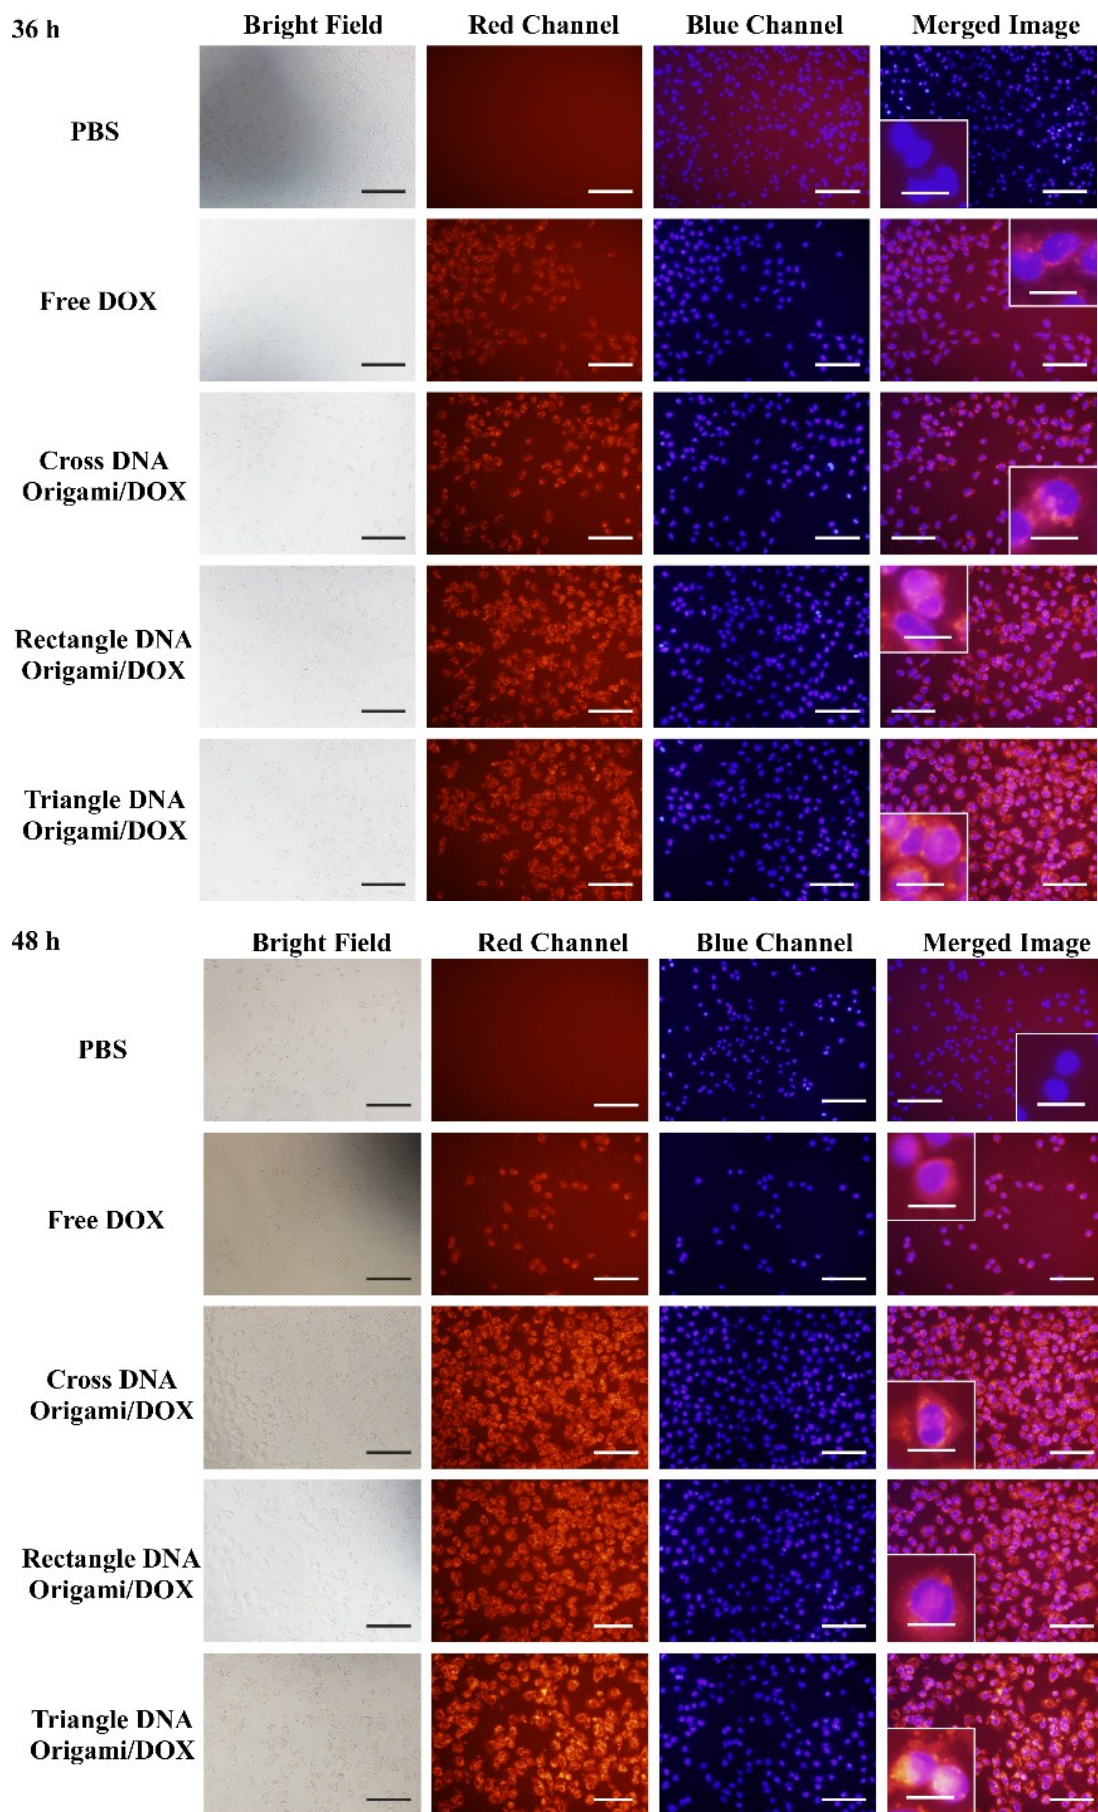

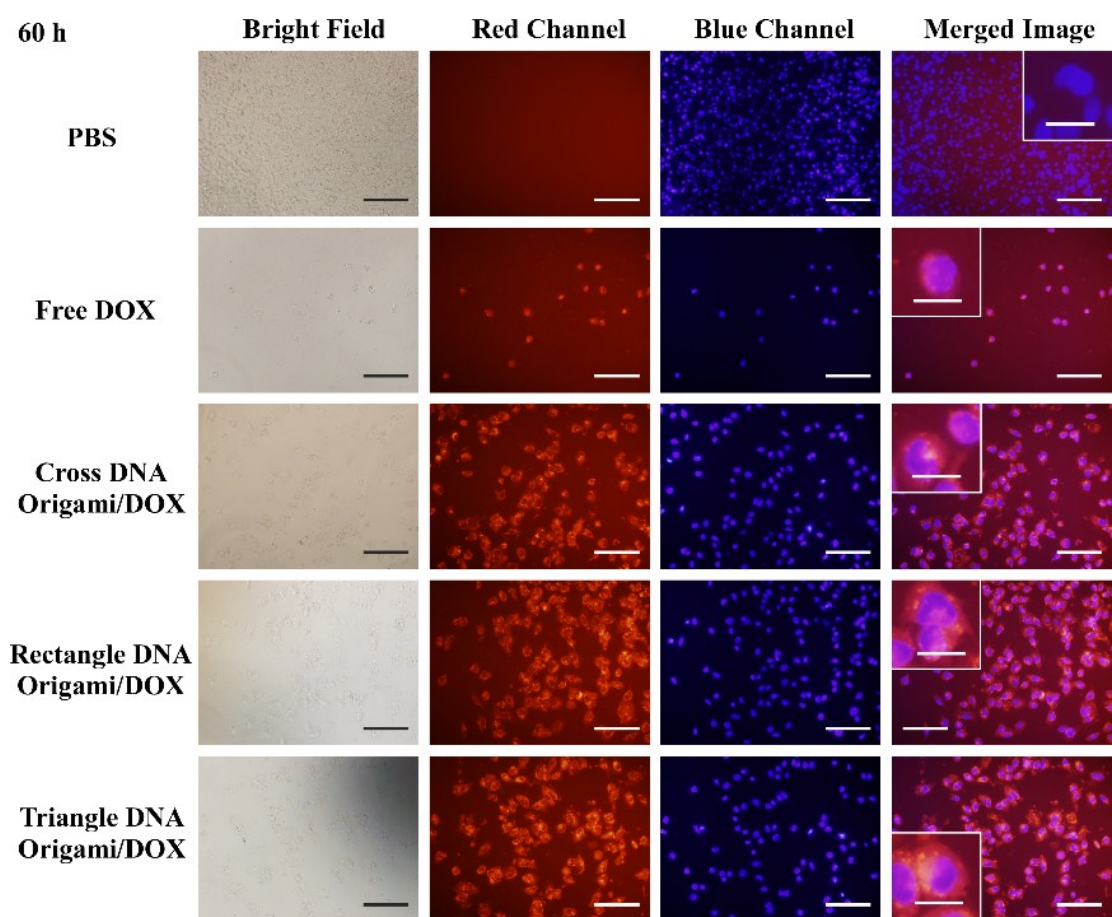

**Figure S4.** Bright-field and fluorescence images of DAPI stained MDA-MB-231 cells treated with the same concentration of DOX-loaded DNA origami and free DOX for 12, 24, 36, 48, and 60 h. The red fluorescence of DOX was captured in red channel and DAPI stained nuclei was captured in blue channel. The merged images demonstrate the co-localization of DOX and nuclei, indicating the diffusion of DOX into nuclei and accumulation. (PBS was used as the negative control.) Scale bar: 100  $\mu\text{m}$ , scale bar in zoomed area: 20  $\mu\text{m}$ .
